# Supplementary material for: High Glucose Induces in HK2 Kidney Cells an IFN–Dependent ZIKV Antiviral Status Fueled by Viperin
Source: MDPI journal article supplement (doi:10.3390/biomedicines10071577), 2022-07-01
Supplement: s1 [file s1]

## Supplementary information

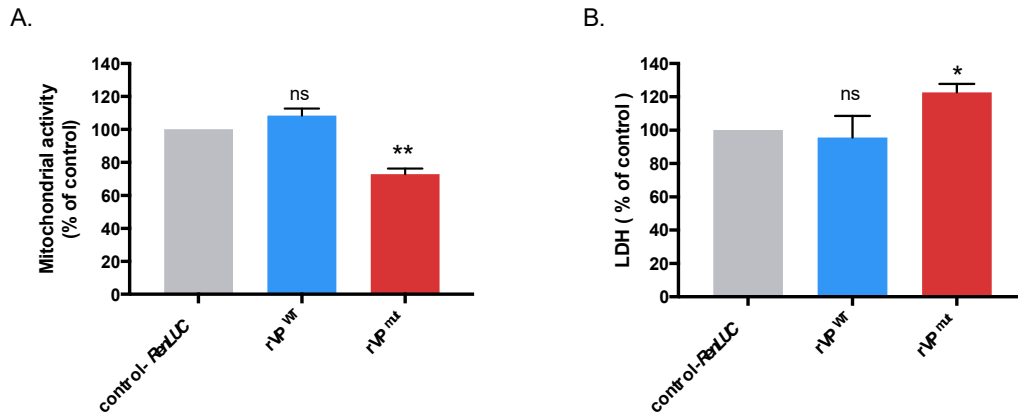

**Figure S1.** Cytopathic effects due to rVP<sup>wt</sup> and rVP<sup>mut</sup> plasmids expression in HK-2 cells. HK-2 cells were transfected with recombinant Viperin wild type (rVP<sup>wt</sup>) and recombinant Viperin mutant (rVP<sup>mut</sup>) plasmids for 48 h with a plasmid expressing ren-LUC as a control. **(A)** The metabolic activity of transfected HK-2 cells was determined using 3-[4,5-dimethylthiazol-2-yl]-2,5-diphenyltetrazolium bromide (MTT) assay. **(B)** Quantification of Lactate Dehydrogenase (LDH) release was performed to evaluate the membrane integrity of transfected HK-2 cells. Data were obtained by measuring the absorbance at 570 nm and 490 nm for MTT and LDH assays respectively, with a background subtraction of the absorbance at 690 nm. Results are shown as means  $\pm$  SD of three independent experiments. Unpaired t-test demonstrates that differences are either non-significant (ns) or statistically significant (\*  $p < 0.05$  and \*\*  $p < 0.01$ ).

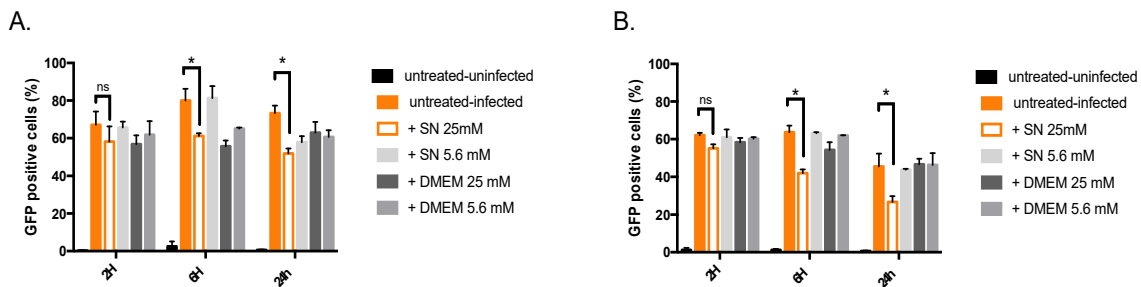

**Figure S2.** Effect of high-glucose HK-2 cells supernatant on ZIKV infection. The supernatant of HK-2 cells grown in high-glucose condition for a 24 h **(A)** or 48 h **(B)** period was transferred on naive HK-2 cells under low-glucose condition at 2 h, 6 h and 24 h pre-infection. The cells were infected with ZIKV<sup>GFP</sup> at a MOI of 1 for 24 h. The cells were then fixed and subjected to flow cytometry analysis. Results are shown as means  $\pm$  SD of three independent experiments. Two-way ANOVA shows that differences are either non-significant (ns) or significant (\*  $p < 0.05$ ).

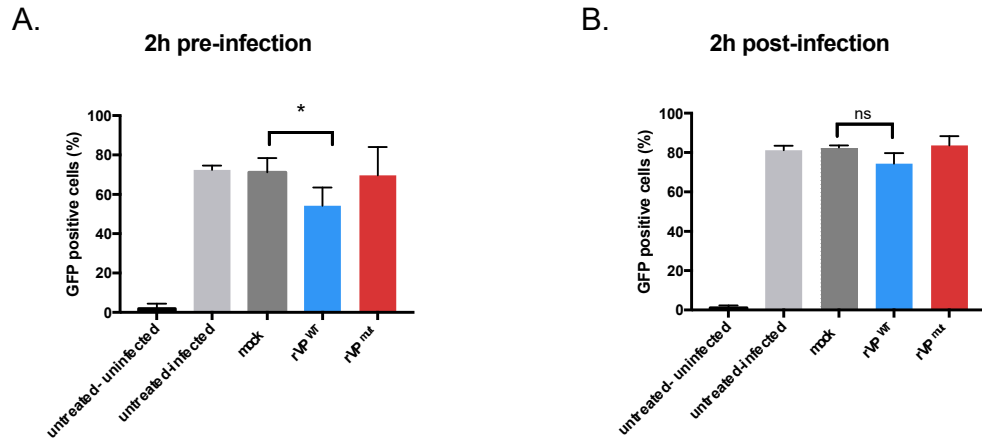

**Figure S3.** Paracrine effect of viperin-HK-2 transfected cells on ZIKV growth in A549 human cells. HK-2 cells were transfected with recombinant Viperin wild type (rVP<sup>wt</sup>) and recombinant Viperin mutant (rVP<sup>mut</sup>) plasmids for 24 h. The supernatant of transfected cells was collected and transferred on A549 cells at (A) 2 h pre-infection and (B) 2 h post-infection. The cells were infected for 24 h with ZIKV<sup>GFP</sup> at a MOI of 1. Results are presented as means  $\pm$  SD of three independent experiments. Unpaired t-test shows that differences are either non-significant (ns) or significant (\*  $p < 0.05$ ).
